# Supplementary material
Source: HighWire-hosted journal article supplement (https://jnm.snmjournals.org/highwire/filestream/94429/field_highwire_adjunct_files/0/101675_Supplemental_Data.pdf)
Supplement: 101675_Supplemental_Data.pdf [file 101675_Supplemental_Data.pdf]

Supplemental Table 1:

| patient no | age (years) | reason for scan |      | PET result | NET     |
|------------|-------------|-----------------|------|------------|---------|
| 1          | 48          |                 | C    | negative   | absent  |
| 2          | 63          | UT              | C    | positive   | absent  |
| 3          | 45          |                 | C    | negative   | absent  |
| 4          | 68          |                 | C TM | negative   | absent  |
| 5          | 63          | UT              |      | positive   | present |
| 6          | 1           |                 | C    | negative   | absent  |
| 7          | 70          | UT              | TM   | negative   | absent  |
| 8          | 51          | UT              | TM   | positive   | absent  |
| 9          | 69          |                 | C TM | positive   | present |
| 10         | 69          |                 | TM   | negative   | absent  |
| 11         | 23          |                 | C    | negative   | absent  |
| 12         | 70          |                 | C    | negative   | absent  |
| 13         | 26          |                 | C TM | negative   | absent  |
| 14         | 53          | UT              | TM   | negative   | absent  |
| 15         | 69          | UT              |      | negative   | absent  |
| 16         | 33          |                 | C    | positive   | present |
| 17         | 55          | UT              | TM   | negative   | present |
| 18         | 31          |                 | TM   | negative   | absent  |
| 19         | 76          | UT              |      | positive   | present |
| 20         | 72          |                 | C TM | negative   | absent  |
| 21         | 69          | UT              | C    | negative   | absent  |
| 22         | 68          |                 | C    | negative   | absent  |
| 23         | 34          |                 | C TM | negative   | absent  |
| 24         | 55          |                 | C    | positive   | present |
| 25         | 71          | UT              |      | negative   | present |
| 26         | 73          | UT              | C    | negative   | absent  |
| 27         | 50          | UT              |      | positive   | present |
| 28         | 58          |                 | C    | negative   | absent  |
| 29         | 69          | UT              | TM   | positive   | present |
| 30         | 73          |                 | TM   | negative   | absent  |
| 31         | 55          | UT              | C TM | positive   | absent  |
| 32         | 63          |                 | C TM | negative   | absent  |
| 33         | 23          | UT              | C    | positive   | absent  |

|    |    |    |      |          |         |
|----|----|----|------|----------|---------|
| 34 | 56 | UT | TM   | negative | present |
| 35 | 78 | UT | TM   | negative | absent  |
| 36 | 60 | UT | C    | negative | absent  |
| 37 | 76 |    | C    | negative | absent  |
| 38 | 68 |    | C TM | positive | present |
| 39 | 67 | UT | C TM | positive | present |
| 40 | 70 |    | C    | negative | absent  |
| 41 | 41 |    | C TM | negative | absent  |
| 42 | 26 | UT |      | positive | absent  |
| 43 | 31 |    | C    | negative | absent  |
| 44 | 68 |    | C TM | negative | absent  |
| 45 | 30 | UT | C    | negative | absent  |
| 46 | 83 | UT | C    | positive | present |
| 47 | 68 | UT | TM   | positive | present |
| 48 | 47 |    | C    | negative | absent  |
| 49 | 43 | UT | C    | negative | absent  |
| 50 | 52 |    | C TM | negative | absent  |
| 51 | 71 | UT | TM   | negative | absent  |
| 52 | 69 |    | C TM | negative | absent  |
| 53 | 75 |    | C    | negative | present |
| 54 | 66 | UT | C TM | positive | present |
| 55 | 76 | UT | TM   | negative | absent  |
| 56 | 44 | UT |      | negative | absent  |
| 57 | 47 |    | C TM | negative | absent  |
| 58 | 66 | UT | C    | negative | absent  |
| 59 | 53 |    | C TM | positive | present |
| 60 | 79 |    | C TM | positive | absent  |
| 61 | 32 |    | C TM | negative | present |
| 62 | 43 |    | C TM | positive | present |
| 63 | 59 |    | C TM | negative | absent  |
| 64 | 62 |    | C    | positive | present |
| 65 | 58 | UT | C    | positive | present |
| 66 | 55 | UT | C TM | positive | present |
| 67 | 31 |    | C    | positive | present |
| 68 | 49 | UT |      | positive | present |

|     |    |    |   |    |          |         |
|-----|----|----|---|----|----------|---------|
| 69  | 80 | UT |   | TM | negative | absent  |
| 70  | 60 | UT |   | TM | negative | absent  |
| 71  | 69 |    | C | TM | negative | absent  |
| 72  | 75 |    | C |    | negative | present |
| 73  | 41 | UT |   | TM | negative | absent  |
| 74  | 55 |    | C |    | negative | absent  |
| 75  | 43 | UT | C |    | negative | absent  |
| 76  | 54 |    | C | TM | negative | absent  |
| 77  | 28 | UT | C |    | negative | absent  |
| 78  | 43 |    | C |    | negative | absent  |
| 79  | 74 | UT |   |    | negative | absent  |
| 80  | 79 | UT |   |    | positive | present |
| 81  | 30 | UT |   |    | negative | absent  |
| 82  | 59 | UT | C |    | negative | absent  |
| 83  | 68 |    | C | TM | negative | absent  |
| 84  | 57 | UT |   |    | negative | present |
| 85  | 66 |    | C |    | negative | absent  |
| 86  | 58 |    | C |    | negative | absent  |
| 87  | 55 |    | C | TM | positive | present |
| 88  | 63 |    | C |    | negative | absent  |
| 89  | 49 |    | C | TM | negative | absent  |
| 90  | 53 |    | C | TM | positive | absent  |
| 91  | 58 | UT |   |    | negative | absent  |
| 92  | 67 | UT |   |    | positive | present |
| 93  | 56 |    | C | TM | negative | absent  |
| 94  | 71 |    | C |    | positive | present |
| 95  | 38 | UT |   |    | positive | present |
| 96  | 66 | UT | C |    | positive | present |
| 97  | 73 | UT |   | TM | positive | present |
| 98  | 49 |    | C |    | negative | absent  |
| 99  | 50 |    | C |    | positive | present |
| 100 | 79 | UT | C | TM | negative | absent  |
| 101 | 74 | UT | C |    | negative | absent  |
| 102 | 50 | UT | C | TM | positive | present |
| 103 | 54 | UT |   | TM | negative | absent  |

**PET reconstruction parameter:**

Reconstruction parameters of the Siemens Biograph 64: 2.5 minutes per bed position, TrueX OSEM reconstruction with scatter correction, three iterations, 21 subsets. Gaussian filter with FWHM 2mm. Reconstruction parameters of the GE Discovery 64: 2.5 minutes per bed position, VUEPoint OSEM FX reconstruction with scatter correction, two iterations, 36 subsets, cut off filter 6.5 mm.

Parameters for the child's examination: The reconstruction parameters were the same as used for adults examined on the GE Discovery 64 PET/CT scanner.

Negative oral contrast was used on a regular basis.
